1 Title: The utility of visual estimation in the rapid assessment of grass abundance for studies  
2 of foraging

3

4 Authors: Hansraj Gautam<sup>1</sup>, G. G. Potdar<sup>2</sup>, T.N.C. Vidya<sup>1,\*</sup>

5

6 <sup>1</sup> Evolutionary and Organismal Biology Unit, Jawaharlal Nehru Centre for Advanced  
7 Scientific Research, Bangalore, India.

8 <sup>2</sup> Department of Botany, Yashwantrao Chavan College of Science, Karad, Maharashtra,  
9 India.

10

11 \* Corresponding author

12 Address for correspondence:

13 T.N.C. Vidya

14 Evolutionary and Organismal Biology Unit

15 Jawaharlal Nehru Centre for Advanced Scientific Research

16 Jakkur, Bangalore – 560 064, India.

17 Email: [tncvidya@jncasr.ac.in](mailto:tncvidya@jncasr.ac.in)

18 Phone: +91-80-22082968

19 Fax: +91-80-22082766

20

1    **Abstract**

2    The collection of detailed forage abundance data for studies of herbivore foraging behavior  
3    is important but often logistically demanding. Rapid sampling measures may help, but it is  
4    essential to assess the utility of such methods in specific habitats. We examined the  
5    relationship between visually estimated cover of grass species and their measured biomass  
6    in Nagarahole National Park. We found that grass cover was an excellent predictor of  
7    biomass within species, and additional height measurements did not improve biomass  
8    estimation. Species-level covers were more reliable than total covers and can be used for  
9    rapid assessment of proportional forage abundance.

10

11    **Keywords**

12    Visual estimation, grass abundance, biomass, species cover, forage.

13

## 1 **Introduction**

2 Estimating forage abundance is a basic requirement for studying ecological and behavioral  
3 aspects of foraging in animals. However, the collection of detailed forage abundance data  
4 may be demanding in terms of effort, time, and resources, which are limitations for most  
5 field biologists. Therefore, rapid assessment methods rather than intensive approaches may  
6 need to be explored for on-site quantification of vegetation (Lavorel *et al.* 2008). Biomass  
7 measurements (for example, Noyce and Coy 1990, Sivaganesan 1991, Guo and Rundel  
8 1997, Chiarucci *et al.* 1999, Henschel *et al.* 2005, Baskaran *et al.* 2010), count/density of  
9 individuals (for example, Noyce and Coy 1990, Guo and Rundel 1997, Blake 2002), and  
10 cover or rank (for example, Noyce and Coy 1990, Guo and Rundel 1997, Chiarucci *et al.*  
11 1999, Blake 2002, Henschel *et al.* 2005, Rebello *et al.* 2013, Iversen *et al.* 2014) have been  
12 used for estimating vegetation abundance in field studies. Measurement of biomass  
13 involves harvesting vegetation in plots and weighing these samples. In terms of time-  
14 effectiveness, overall biomass measurement of a plot is not time consuming, while species-  
15 level measurements are, as they involve segregation of individuals of different species  
16 before weighing. Counts of individuals are practical for assessing tree abundance but not  
17 the abundance of lower strata vegetation such as herbs or grasses, for which cover is often  
18 used. Cover is estimated either visually (Guo and Rundel 1997) or by following the point  
19 quadrat method, in which the number of contacts with a fixed number of pins passed  
20 through the vegetation to the ground is used to estimate cover (for example, Goodall 1952,  
21 Jonasson 1988, Chiarucci *et al.* 1999).

22

23 Measurement of biomass would be ideal for assessing the quantity of forage available for  
24 consumption, but it may not be logistically possible (because of permits) or advisable to

1 measure biomass on a large scale because it requires harvesting all the vegetation of the  
2 sampling plots. Therefore, there have been previous attempts to examine whether cover  
3 can be used as a surrogate for biomass. While Jonasson (1988) found strong correlations  
4 between cover and biomass, Guo and Rundel (1997) found that cover did not detect  
5 differences between plant communities the way biomass did, and Chiarucci *et al.* (1999)  
6 and Lavorel *et al.* (2008) clarified that inferences about community structure or functional  
7 trait values based on cover and biomass could be concordant or not depending upon the  
8 ecological feature being examined. Further, discordance between the measures of  
9 abundance was primarily seen in subtle aspects of community structure (Chiarucci *et al.*  
10 1999). We, therefore, thought that visual estimation of cover may still potentially be a  
11 reliable, time-effective method for estimating forage abundance for herbivores, as one is  
12 generally looking for broader patterns in abundance rather than subtle differences in this  
13 case. Visual estimations of abundance have been used previously to assess spatio-temporal  
14 distributions of food resources (for example, Noyce and Coy 1990, Rebollo *et al.* 2013,  
15 Iversen *et al.* 2014), although the reliability of the method has seldom been assessed (but  
16 see Noyce and Coy 1990 for fruit abundance) in areas other than paddocks or simple, open  
17 ecosystems (for example, Waite 1994, Guo and Rundel 1997, Henschel *et al.* 2005).

18

19 We undertook the current study with the objective of assessing the utility of visual  
20 estimation as a time-effective method of on-site assessment of grasses in a tropical forest  
21 comprising multiple vegetation strata. This is important for characterizing forage  
22 distribution in elephants, which show a high proportion of grass in their diet (Owen-Smith  
23 1988, Sukumar 1990, Baskaran *et al.* 2010, Roy and Chowdhary 2014), and grazing  
24 ungulates. The two questions that we address here are the following:

1        1. How do visual estimates of grass cover of individual species relate to their  
2            respective biomass measurements?

3        2. What is the relationship between the total grass cover estimated and the total grass  
4            biomass, and is the sum of species-level visual estimates better than the total grass  
5            cover visual estimate in predicting total grass biomass?

6        For the purpose of this study, grasses include sedges also (although they are from different  
7            families) because they are ecologically similar and because the number of sedges in the  
8            area was very small.

9

## 10    **Methods**

11        The study was carried out at the end of the wet season, from November to December 2013,  
12        in Nagarahole National Park (area: 644 km<sup>2</sup>, 11.85°-12.26° N, 76.00°-76.28° E), which lies  
13        in the Nilgiris-Eastern Ghats landscape in southern India (Figure 1). The vegetation is  
14        characteristically tropical deciduous forest comprising several strata and is home to several  
15        herbivores, including Asian elephants, on which a long-term project based on uniquely  
16        identified individuals is currently ongoing (see Vidya *et al.* 2014). Based on a forest type  
17        classification map of the region developed by Pascal (1982), Nagarahole National Park  
18        was divided into the three major forest types: dry deciduous forest, moist deciduous forest,  
19        and teak plantations. We had previously divided the area into 2 km x 2 km grids, with 60  
20        1-km line transects generated in randomly selected grids. During the present study, 23  
21        transects in the southern part of the park were sampled because of logistical constraints in  
22        sampling the northern parts. To improve the sample size, 17 additional sites, at least half a  
23        km away from the random transects and at least 100 m away from forest roads, were

1 chosen for sampling, resulting in a total of 40 sampling sites. Care was taken to adequately  
2 represent all three forest types (based on their availability) in the sampling sites. Sampled  
3 locations are mapped in Figure 1.

4

5 Sampling was carried out in 20 m x 5 m plots at the starting point or the end point of the  
6 transect. In all but one of the plots, three 1 m x 1 m quadrats were sampled, equidistant  
7 along a straight diagonal line (in one plot, only two quadrats could be sampled).  
8 Measurements on grass abundance were made in these 119 quadrats at two levels. First,  
9 total grass cover (union of all grass species cover) was visually estimated by a single  
10 observer (HG) as the percentage of quadrat area covered by all grasses. Second, grass  
11 cover for each grass species was visually estimated, independent of the cover of other  
12 species. Cover was usually estimated to the closest 5% or in interval bins of 5%, in which  
13 case, the middle value of the interval was chosen as the cover value. Values of less than  
14 5% were entered in the case of rare species that were represented by only one or two  
15 individuals in the quadrat. Grass height was also measured since it could possibly improve  
16 the estimation of biomass along with visually estimated cover. Four individuals (except in  
17 the case of rare species, in which fewer than 4 individuals were available) of each species  
18 were arbitrarily selected, their natural standing heights (i.e. without straightening the plant)  
19 measured with a scale, and the average of these taken as the height for that species. The  
20 total grass (wet) biomass was measured using a digital weighing balance (to the closest  
21 gram) after harvesting all the grass from the ground level. Individuals were then hand-  
22 sorted into the respective species, and the biomass for each species was measured.

23

1 The unit of analysis was the 20 m x 5 m plot. Values of different variables in 1 m x 1 m  
2 quadrats were averaged to obtain values for the plots. Apart from total grass cover, overall  
3 grass cover was also measured as the sum of individual grass species' covers (which could  
4 exceed 100 since each species was assessed independently). Total grass cover, sum of  
5 grass species' cover, and total biomass were normally distributed, while cover, biomass,  
6 and height for individual species were not. The latter variables were, therefore, log  
7 transformed for the analyses, although the analyses were also performed on untransformed  
8 data to examine how different the results were. We first carried out a test for the  
9 homogeneity of slopes to inspect the effect of habitat type on the relationship between  
10 biomass and grass cover. Since there was no effect of habitat type on this relationship (see  
11 Results), we used simple regressions of biomass on overall grass covers (total grass cover  
12 and sum of grass species' covers) to assess the usability of the latter measure. The same  
13 analyses were also carried out using individual grass species' covers in 10 species (the  
14 other species were present in fewer than 10 plots). At the level of individual species, we  
15 also checked whether multiple regressions that included species heights, in addition to  
16 individual grass species' covers, were better able to explain variation in individual species'  
17 biomass compared to regressions without height included. Data were analyzed using  
18 Statistica 8 (StatSoft Inc. 2007).

19

## 20 **Results**

21 Based on the 40 plots (119 quadrats) sampled in three habitat types, we found no effect of  
22 habitat type on the relationship between total biomass and total grass cover (Homogeneity  
23 of slopes: Effect of habitat:  $F[2,34]=0.219$ ,  $P=0.805$ ; Effect of total grass cover:  
24  $F[1,34]=30.192$ ,  $P<0.001$ ) or on the relationship between total biomass and the sum of

1 grass species' covers (Homogeneity of slopes: Effect of habitat:  $F[2,34]=0.448$ ,  $P=0.643$ ;  
2 Effect of sum of grass species' covers:  $F[1,34]=57.291$ ,  $P<0.001$ ). Therefore, we ignored  
3 habitat as a factor and analyzed data from all the plots together. We found that while both  
4 total grass cover and the sum of grass species' covers were able to explain total biomass to  
5 a reasonable extent, the sum of grass species' covers had better explanatory power than  
6 total grass cover (total grass cover:  $F[1,38]=54.669$ ,  $Adjusted R^2=0.579$ ,  $P<0.000$ ; sum of  
7 grass species' covers:  $F[1,38]=81.673$ ,  $Adjusted R^2=0.674$ ,  $P<0.000$ , Figure 2).

8

9 Species-level analyses showed strong relationships between biomass and visually  
10 estimated cover in all the common grass species (which were present in 10 or more plots)  
11 analyzed (Table 1). The adjusted  $R^2$  values for the untransformed data were also almost as  
12 high as those for log transformed data (Table 1). Multiple regression of species biomass on  
13 species cover and species' average height also yielded high  $R^2$  values (Table 1), but  
14 average height did not have a significant effect in any species other than *Oplismenus*  
15 *compositus* ( $\beta=0.180$ ,  $P=0.031$ ). Overall, adjusted  $R^2$  values from the simple regression  
16 and multiple regression were not different from one another (Wilcoxon matched pairs test:  
17  $T=18.0$ ,  $Z=0.968$ ,  $P=0.333$ ).

18

## 19 **Discussion**

20 These results show that the simple method of visually assessing grass cover works well as  
21 a proxy for biomass of individual species, as well as total biomass, in the more complex  
22 habitat that we examined. The area that we examined had trees and dense non-grass  
23 understorey vegetation, unlike the pasture land and open areas without multiple



1 vegetational strata that were examined in previous studies. At the level of individual  
2 species, all the species examined showed high  $R^2$  values in the regressions of species  
3 biomass on species cover and there was no clear advantage of including grass height, in  
4 addition to species cover, in predicting species biomass. This is probably because all our  
5 plots were in forested areas that did not have many tall grasses as seen in some other  
6 forests and areas around swamps. Since there was no advantage of including grass height  
7 in addition to species cover in predicting biomass, this would further reduce the time and  
8 effort required to assess forage abundance in our study area.

9

10 We found, surprisingly, that the relationship between the sum of grass species' covers and  
11 total green biomass was stronger than that between total grass cover and total green  
12 biomass. Normally, one would not expect the sum of species' covers to be a useful  
13 measure as it exceeds 100% and there is no particular reason to include between-species  
14 leaf overlaps but not within-species overlaps (Wilson 2011). However, the sum of grass  
15 species' covers probably performs better than total grass cover when the within-species  
16 leaf overlap is smaller than the between-species leaf overlap. This might be true of forests  
17 with multiple strata, in which individuals in the lower strata avoid self-shading and  
18 individuals of the same species are not very close to one another in order to reduce  
19 competition. Thus, collecting data on species cover is important in this situation and mere  
20 total cover estimation will not suffice. Since the sum of grass species' cover better  
21 represents total biomass compared to total cover, one can also estimate the proportional  
22 abundance of foods by dividing the sum of food species covers by the sum of all species'  
23 covers. This would be useful because it is much simpler to assess individual species'  
24 covers in the field and calculate the proportional abundance of foods later on, than to  
25 visually judge what proportion of grass cover is represented by all the food species

1 combined. The latter would entail remembering all the food species in the field and making  
2 a combined estimation of only those species present in each plot.

3

4 We thus find that the visual estimation method performs very well in assessing forage  
5 availability in a tropical forest, which can be used in studies on elephant habitat and forage  
6 selection. This will save time and allow for sampling a greater number of sites. We do not,  
7 however, imply that such relationships are transferable to other forests and suggest  
8 independent assessments before using the visual estimation method.

9

## 10 **Acknowledgements**

11 This work was funded by the Department of Science and Technology's (Government of  
12 India) Ramanujan Fellowship to TNCV, the Council of Scientific and Industrial Research,  
13 Government of India, and National Geographic Society, USA. JNCASR provided logistic  
14 support. We thank the office of the PCCF, Karnataka Forest Department, for field permits,  
15 and various officials and staff of Nagarhole National Park for permits and support at the  
16 field site. Ranga, Shankar and Krishna provided field assistance.

17

## 18 **References**

19 1. Lavorel, S., Grigulis, K., McIntyre, S., Williams, N. S. G., Garden, D., Dorrough, J.,  
20 Berman, S., Quétier, F., Thébault, A. and Bonis, A., Assessing functional diversity in  
21 the field - methodology matters! *Funct. Ecol.*, 2008, **22**, 134-147.

- 1 2. Noyce, K. V. and Coy, P. L., Abundance and productivity of bear food species in  
2 different forest types of northcentral Minnesota. In *Bears: Their Biology and*  
3 *Management*, Vol. 8, A Selection of Papers from the Eighth International Conference  
4 on Bear Research and Management, Victoria, British Columbia, 1990, pp. 169-181.
- 5 3. Sivaganesan, N., Ecology and conservation of elephants with special reference to  
6 habitat utilization in Mudumalai Wildlife Sanctuary, Tamil Nadu, south India. Ph.D.  
7 thesis, Bharathidasan University, Tiruchirapalli, 1991.
- 8 4. Guo, Q. and Rundel, P. W., Measuring dominance and diversity in ecological  
9 communities: choosing the right variables. *J. Veg. Sci.*, 1997, **8**, 405-408.
- 10 5. Chiarucci, A., Wilson, J. B., Anderson, B. J. and De Dominicis, V., Cover versus  
11 biomass as an estimate of species abundance: does it make a difference to the  
12 conclusions? *J. Veg. Sci.*, 1999, **10**, 35-42.
- 13 6. Blake, S., The ecology of forest elephant distribution and its implications for  
14 conservation. Ph.D. thesis, University of Edinburgh, Edinburgh, 2002.
- 15 7. Henschel, J. R., Burke, A. and Seely, M., Temporal and spatial variability of grass  
16 productivity in the central Namib desert. *Afr. Study Monogr.*, 2005, **30**, 43-56.
- 17 8. Baskaran, N., Balasubramanian, M., Swaminathan, S. and Desai, A. A., Feeding  
18 ecology of the Asian Elephant *Elephas maximus* Linnaeus in the Nilgiri Biosphere  
19 Reserve, southern India. *J. Bombay Nat. Hist. Soc.*, 2010, **107**, 3–13.
- 20 9. Rebollo, S., Milchinas, D. G., Stapp, P., Augustine, D. J. and Derner, J. D.,  
21 Disproportionate effects of non-colonial small herbivores on structure and diversity of  
22 grassland dominated by large herbivores. *Oikos*, 2013, **122**, 1757-1767.
- 23 10. Iversen, M., Fauchald, P., Langeland, K., Ims, R. A., Yoccoz, N. G. and Bråthen, K.  
24 A., Phenology and cover of plant growth forms predict herbivore habitat selection in a  
25 high latitude ecosystem. *PLoS One*, 2014, **9**, 1-11.

- 1 11. Goodall, D. W., Some considerations in the use of point quadrats for the analysis of  
2 vegetation. *Aust. J. Sci. Res. Ser. B.*, 1952, **5**, 1-41.
- 3 12. Jonasson, S., Evaluation of the point intercept method for the estimation of plant  
4 biomass. *Oikos*, 1988, **52**, 101-106.
- 5 13. Waite, R. B., The application of visual estimation procedures for monitoring pasture  
6 yield and composition in exclosures and small plots. *Trop. Grasslands*, 1994, **28**, 38-  
7 42.
- 8 14. Owen-Smith, R. N., *Megaherbivores: The influence of very large body size on ecology*.  
9 Cambridge University Press, Cambridge, 1988.
- 10 15. Sukumar, R., Ecology of the Asian elephant in southern India. II. Feeding habits and  
11 crop raiding patterns. *J. Trop. Ecol.*, 1990, **6**, 33-53.
- 12 16. Roy, M. and Choudhary, S., Foraging Ecology of the Asian Elephant in Northern West  
13 Bengal. *Gajah*, 2014, **40**, 18-25.
- 14 17. Vidya, T. N. C., Prasad, D. and Ghosh, A., Individual identification in Asian elephants.  
15 *Gajah*, 2014, **40**, 3-17.
- 16 18. Pascal, J. P., *Bioclimates of the Western Ghats*, French Institute of Pondicherry,  
17 Pondicherry, 1982, Maps 1-2.
- 18 19. StatSoft Inc., Statistica 8. StatSoft, Inc., Tulsa, Oklahoma, 2007.
- 19 20. Wilson, J. B., Cover plus: ways of measuring plant canopies and the terms used for  
20 them. *J. Veg. Sci.*, 2011, **22**, 197–206.

21

## 1 Tables

2 **Table 1.** Results of regressions of species biomass on visually estimated species cover and  
 3 of species biomass on visually estimated species cover and measured average species  
 4 height. All species except *Cyrtococcum patens* in this table are food species. \*Grass 57  
 5 was an unidentified species.

| Species Name                  | Regression of species biomass on species cover ( <i>Adj. R<sup>2</sup></i> for untransformed data in parentheses; all <i>P</i> values for these are <0.001) | Multiple regression of species biomass on species cover and average species height ( <i>Adj. R<sup>2</sup></i> for untransformed data in parentheses; all <i>P</i> values for these are <0.001) |
|-------------------------------|-------------------------------------------------------------------------------------------------------------------------------------------------------------|-------------------------------------------------------------------------------------------------------------------------------------------------------------------------------------------------|
| <i>Axonopus compressus</i>    | $F[1,19]=80.542$ , <i>Adj. R<sup>2</sup></i> =0.799<br>( <i>Adj. R<sup>2</sup></i> =0.653), <i>P</i> <0.001.                                                | $F[2,16]=22.917$ , <i>Adj. R<sup>2</sup></i> =0.709<br>( <i>Adj. R<sup>2</sup></i> =0.610), <i>P</i> <0.001.                                                                                    |
| <i>Chloris dolichostachya</i> | $F[1,19]=188.490$ , <i>Adj. R<sup>2</sup></i> =0.904<br>( <i>Adj. R<sup>2</sup></i> =0.901), <i>P</i> <0.001.                                               | $F[2,16]=68.670$ , <i>Adj. R<sup>2</sup></i> =0.883<br>( <i>Adj. R<sup>2</sup></i> =0.899), <i>P</i> <0.001.                                                                                    |
| <i>Cynodon dactylon</i>       | $F[1,16]=226.440$ , <i>Adj. R<sup>2</sup></i> =0.930<br>( <i>Adj. R<sup>2</sup></i> =0.826), <i>P</i> <0.001.                                               | $F[2,11]=82.611$ , <i>Adj. R<sup>2</sup></i> =0.926<br>( <i>Adj. R<sup>2</sup></i> =0.818), <i>P</i> <0.001.                                                                                    |
| <i>Cyrtococcum accrescens</i> | $F[1,26]=104.500$ , <i>Adj. R<sup>2</sup></i> = 0.793<br>( <i>Adj. R<sup>2</sup></i> = 0.590), <i>P</i> <0.001.                                             | $F[2,23]=55.981$ , <i>Adj. R<sup>2</sup></i> =0.815<br>( <i>Adj. R<sup>2</sup></i> =0.620), <i>P</i> <0.001.                                                                                    |
| <i>Cyrtococcum oxyphyllum</i> | $F[1,19]=191.950$ , <i>Adj. R<sup>2</sup></i> =0.905<br>( <i>Adj. R<sup>2</sup></i> =0.854), <i>P</i> <0.001.                                               | $F[2,17]=69.831$ , <i>Adj. R<sup>2</sup></i> =0.879<br>( <i>Adj. R<sup>2</sup></i> =0.861), <i>P</i> <0.001.                                                                                    |
| <i>Cyrtococcum patens</i>     | $F[1,10]=401.410$ , <i>Adj. R<sup>2</sup></i> =0.973<br>( <i>Adj. R<sup>2</sup></i> =0.867), <i>P</i> <0.001.                                               | $F[2,9]=186.820$ , <i>Adj. R<sup>2</sup></i> =0.971<br>( <i>Adj. R<sup>2</sup></i> =0.874), <i>P</i> <0.001.                                                                                    |
| Grass 57*                     | $F[1,12]=63.451$ , <i>Adj. R<sup>2</sup></i> =0.828,                                                                                                        | $F[2,8]=8.387$ , <i>Adj. R<sup>2</sup></i> =0.596                                                                                                                                               |

|                              |                                                                           |                                                                          |
|------------------------------|---------------------------------------------------------------------------|--------------------------------------------------------------------------|
|                              | (Adj. $R^2=0.732$ ), $P<0.001$ .                                          | (Adj. $R^2=0.846$ ), $P=0.011$ .                                         |
| <i>Kyllinga monocephala</i>  | $F[1,21]=334.110$ , Adj. $R^2=0.938$<br>(Adj. $R^2=0.770$ ), $P<0.001$ .  | $F[2,16]=130.930$ , Adj. $R^2=0.935$<br>(Adj. $R^2=0.875$ ), $P<0.001$ . |
| <i>Oplismenus compositus</i> | $F[1,36]=240.340$ , Adj. $R^2= 0.866$<br>(Adj. $R^2=0.777$ ), $P<0.001$ . | $F[2,34]=133.800$ , Adj. $R^2=0.881$<br>(Adj. $R^2=0.815$ ), $P<0.001$ . |
| <i>Oryza sativa</i>          | $F[1,14]=54.713$ , Adj. $R^2= 0.782$<br>(Adj. $R^2=0.852$ ), $P<0.001$ .  | $F[2,11]=37.930$ , Adj. $R^2=0.850$<br>(Adj. $R^2=0.834$ ), $P<0.001$ .  |

1

2

1 **Figure legends**

2

3 **Figure 1.** Locations of sampling sites in the study area. The forest type classification is  
4 based on Pascal (1982).

5

6 **Figure 2.** Relationships between a) total grass cover and total biomass and b) the sum of  
7 grass species' covers and total grass biomass.

8

1 **Figure 1**

2

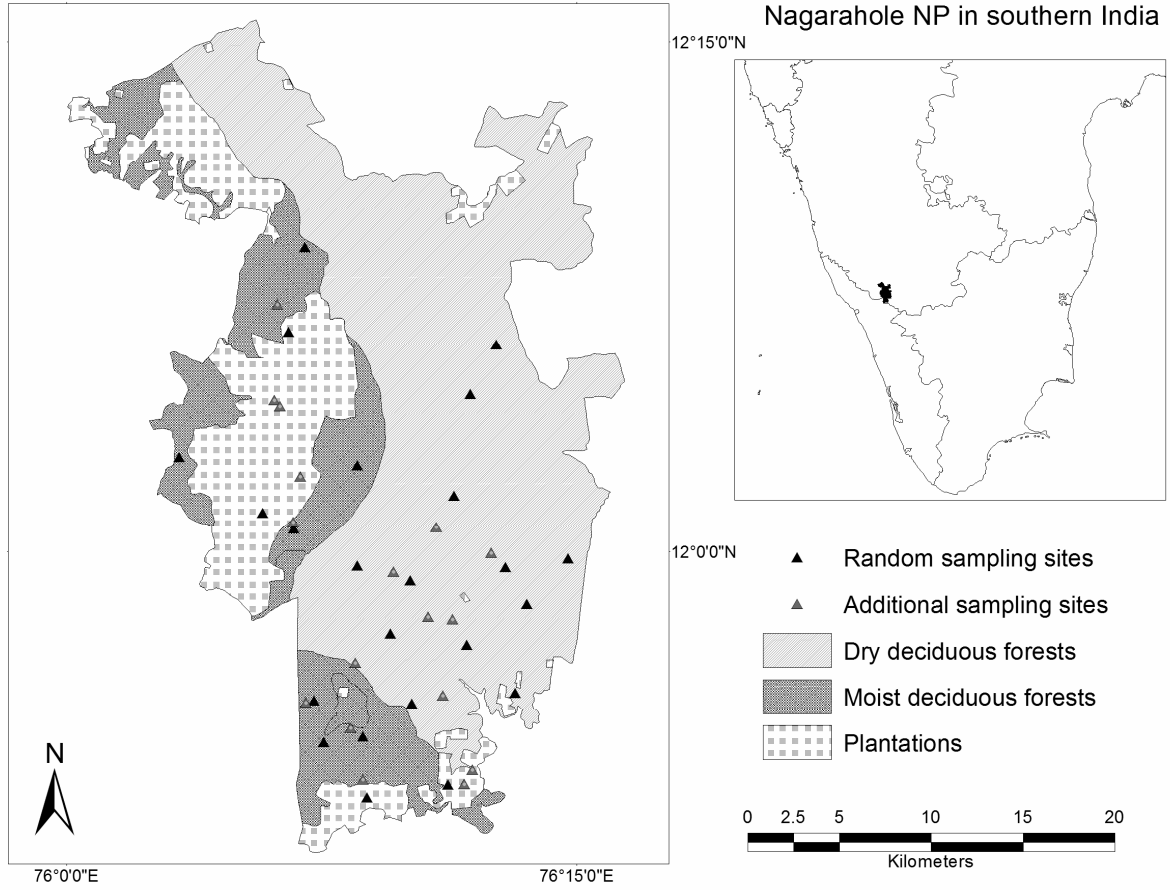

3

4



1 **Figure 2**

2

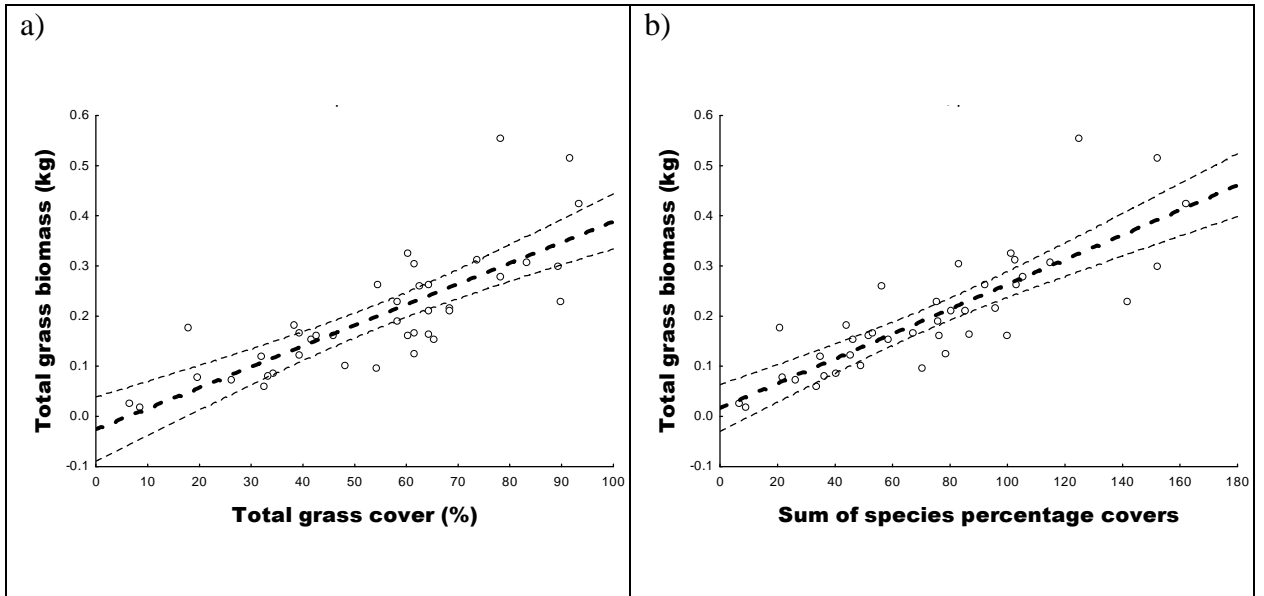

3

4
